# Supplementary material for: Induction of unidirectional π-electron rotations in low-symmetry aromatic ring molecules using two linearly polarized stationary lasers
Source: Royal Society of Chemistry journal article supplement (doi:10.1039/c6cp04254f), 2016-01-01
Supplement: c6cp04254f1.pdf [file c6cp04254f1.pdf]

### Supporting Information

| Nr. | Atom | X         | Y         | Z         |
|-----|------|-----------|-----------|-----------|
| 1   | C    | -1.199125 | 0.195487  | 0.007724  |
| 2   | C    | -1.204282 | -1.197737 | 0.007724  |
| 3   | C    | -0.000000 | -1.898098 | 0.006451  |
| 4   | C    | 1.204282  | -1.197737 | 0.007724  |
| 5   | C    | 1.199125  | 0.195487  | 0.007724  |
| 6   | C    | -0.000000 | 0.912818  | 0.005155  |
| 7   | H    | -2.139587 | 0.735525  | 0.012573  |
| 8   | H    | -2.145145 | -1.733580 | 0.012494  |
| 9   | H    | -0.000000 | -2.980597 | 0.009400  |
| 10  | H    | 2.145145  | -1.733580 | 0.012494  |
| 11  | H    | 2.139587  | 0.735525  | 0.012573  |
| 12  | C    | -0.000000 | 2.415831  | -0.030217 |
| 13  | H    | 0.882490  | 2.820789  | 0.462959  |
| 14  | H    | -0.000000 | 2.778826  | -1.059173 |
| 15  | H    | -0.882490 | 2.820789  | 0.462959  |

Table S1. Optimized geometry data of toluene by MP2/6-311++G(3df,2p) in Cartesian coordinates are shown in unit of angstrom. Number of atoms and Cartesian coordinates are shown in Fig. S1.

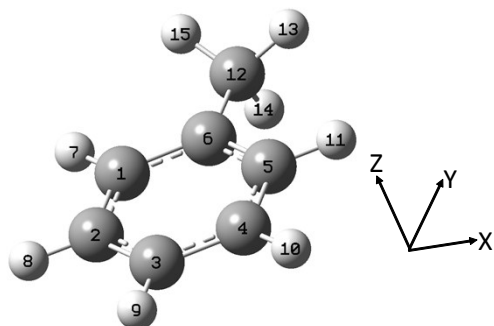

Fig. S1. Geometrical structure of toluene ( $C_7H_8$ ).

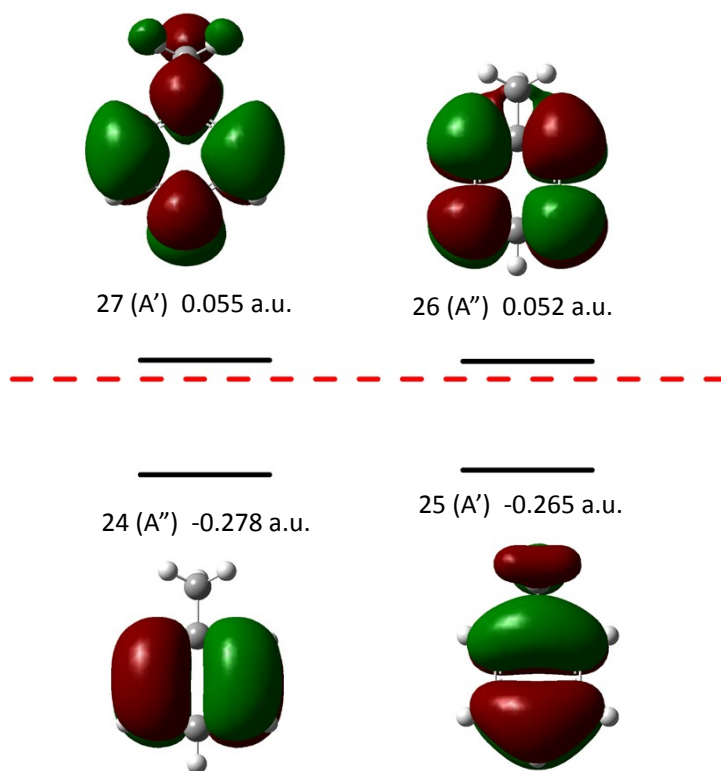

Fig. S2. Active orbitals with orbital energies, which were obtained by the CASSCF calculation, are shown.

CASSCF wavefunctions:

$\Phi_{S_0}(A') \equiv |\phi_{24}\bar{\phi}_{24}\phi_{25}\bar{\phi}_{25}|$  for the ground state configuration.  $\Psi_{S_0}(A') = 0.975\Phi_{S_0(A')} + L$  for the ground state.

The lower four singlet excited states are approximately expressed as a linear combination of the one-electron excited configurations as

$$\Psi_{S_1(A')} = 0.524 \left( |\phi_{24}\bar{\phi}_{24}\phi_{25}\bar{\phi}_{26}| - |\phi_{24}\bar{\phi}_{24}\bar{\phi}_{25}\phi_{26}| \right) + 0.469 \left( |\phi_{24}\bar{\phi}_{27}\phi_{25}\bar{\phi}_{25}| - |\bar{\phi}_{24}\phi_{27}\phi_{25}\bar{\phi}_{25}| \right)$$

$$\Psi_{S_2(A')} = 0.511 \left( |\phi_{24}\bar{\phi}_{24}\phi_{25}\bar{\phi}_{27}| - |\phi_{24}\bar{\phi}_{24}\bar{\phi}_{25}\phi_{27}| \right) + 0.487 \left( |\phi_{24}\bar{\phi}_{26}\phi_{25}\bar{\phi}_{25}| - |\bar{\phi}_{24}\phi_{26}\phi_{25}\bar{\phi}_{25}| \right)$$

$$\Psi_{S_3(A')} = -0.458 \left( |\phi_{24}\bar{\phi}_{24}\phi_{25}\bar{\phi}_{26}| - |\phi_{24}\bar{\phi}_{24}\bar{\phi}_{25}\phi_{26}| \right) + 0.513 \left( |\phi_{24}\bar{\phi}_{27}\phi_{25}\bar{\phi}_{25}| - |\bar{\phi}_{24}\phi_{27}\phi_{25}\bar{\phi}_{25}| \right)$$

$$\Psi_{S_4(A')} = -0.473 \left( |\phi_{24}\bar{\phi}_{24}\phi_{25}\bar{\phi}_{27}| - |\phi_{24}\bar{\phi}_{24}\bar{\phi}_{25}\phi_{27}| \right) + 0.498 \left( |\phi_{24}\bar{\phi}_{26}\phi_{25}\bar{\phi}_{25}| - |\bar{\phi}_{24}\phi_{26}\phi_{25}\bar{\phi}_{25}| \right)$$

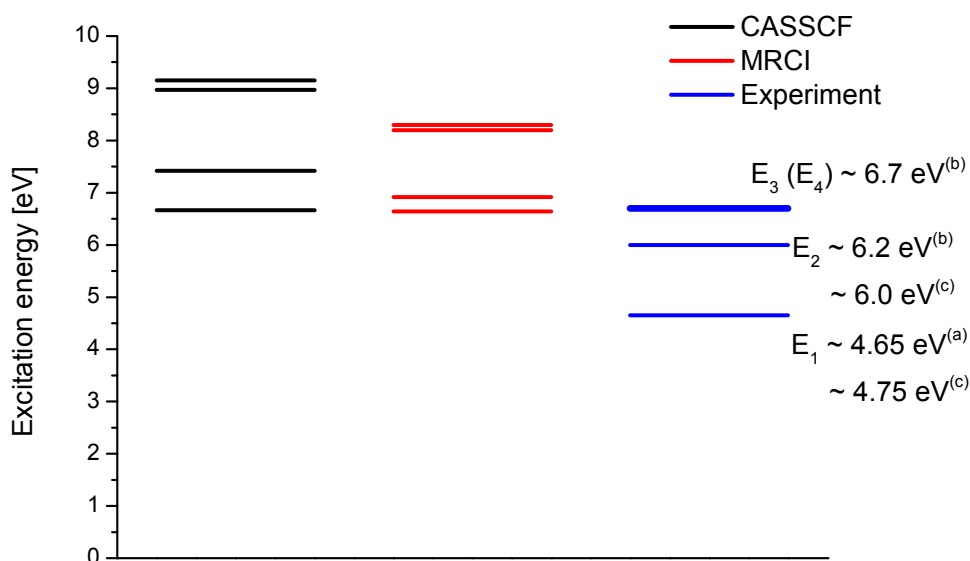

Fig. S3. Comparison of the excitation energies between the computational levels:

CASSCF/6-311++G(3df,2p), MRCI/6-311++G(3df,2p) and experimental data<sup>(a), (b), (c)</sup>.

Table S2. Data of the excitation energies calculated by CASSCF/6-311++G(3df,2p), MRCI/6-311++G(3df,2p) and experimental data<sup>(a), (b), (c)</sup>.

|              | E <sub>1</sub> [eV]                        | E <sub>2</sub> [eV]                      | E <sub>3</sub> [eV] | E <sub>4</sub> [eV] |
|--------------|--------------------------------------------|------------------------------------------|---------------------|---------------------|
| CASSCF(4, 4) | 6.63                                       | 7.42                                     | 8.97                | 9.15                |
| MRCI         | 6.64                                       | 6.91                                     | 8.20                | 8.30                |
| Exp.         | 4.65 <sup>(a)</sup><br>4.75 <sup>(c)</sup> | 6.2 <sup>(b)</sup><br>6.0 <sup>(c)</sup> | 6.7 <sup>(b)</sup>  | 6.7 <sup>(b)</sup>  |

## References

- (a) N. Ginsburg, W.W. Robertson, and F.A. Matsen, *J. Chem. Phys.*, 9, 511 (1946).
- (b) M.B. Robin, *Higher Excited states of Polyatomic Molecules*. (Academia New York, 1975), Vol. 2.
- (c) B.D. Mistry, *A Handbook of Spectroscopic Data Chemistry (UV, IR, PMR, 13CNMR and Mass Spectroscopy)*, Oxford Book Company, Jaipur, India, 2009). On pp. 16-17 4.75 eV for S<sub>1</sub>, and 6.0 eV for S<sub>2</sub> in Methanol (2%). There is no data for S<sub>3</sub> and S<sub>4</sub>.
